# Supplementary material for: Bayesian Statistics for Medical Devices: Progress Since 2010
Source: Springer Nature journal article supplement (doi:10.1007/s43441-022-00495-w), 2023-03-03
Supplement: MOESM1 [file 43441_2022_495_MOESM1_ESM.pdf]

# **Supplementary Material for “Bayesian Statistics for Medical Device: Progress Since 2010” in the journal Theoretical and Innovative Regulatory Science**

By Gregory Campbell, Telba Irony, Gene Pennello and Laura Thompson

Corresponding author:

Gregory Campbell, GCStat Consulting LLC, GCStat@verizon.net

1. Annotated list of publicly available PMA Summaries of Safety and Effectiveness (SSEDs) for PreMarket Approval Applications (PMAs) and PMA Supplements (PMASs) approved by FDA 1998-2021 that used Bayesian statistics

S1. P970033

Multi-frequency Impedance Breast Scanner

T-Scan 2000 by TransScan Medical, Inc.

Approved April 16, 1999 after a panel August 17, 1998.

SSED describes a Bayesian model to combine three studies.

[https://www.accessdata.fda.gov/cdrh\\_docs/pdf/P970033b.pdf](https://www.accessdata.fda.gov/cdrh_docs/pdf/P970033b.pdf)

(accessed August 23, 2022).

S2. P970015

Intervertebral Body Fusion Device

INTER FIX™ Threaded Interbody Fusion Device by Sofamor-Danek

Approved May 14, 1999 after a Bayesian panel December 11, 1997.

Bayesian predictive probabilities

[https://www.accessdata.fda.gov/cdrh\\_docs/pdf/P970015b.pdf](https://www.accessdata.fda.gov/cdrh_docs/pdf/P970015b.pdf)

(accessed August 23, 2022).

S3. P980048

Cervical Interbody Fusion System Instrumentation

BAK/Cervical Interbody Fusion System by Sulzer SpineTech approved April 20, 2001 after a Bayesian panel meeting January 19, 2001.

Bayesian success criterion; credible intervals

[https://www.accessdata.fda.gov/cdrh\\_docs/pdf/P980048b.pdf](https://www.accessdata.fda.gov/cdrh_docs/pdf/P980048b.pdf)

(accessed August 23, 2022).

S4. P000053

Implanted Mechanical/hydraulic Urinary Continence Device

AMS Sphincter 800™ Urinary Prosthesis by American Medical Systems

Approved June 14, 2001 with no panel meeting.

Hierarchical Bayesian model

[https://www.accessdata.fda.gov/cdrh\\_docs/pdf/P000053b.pdf](https://www.accessdata.fda.gov/cdrh_docs/pdf/P000053b.pdf)

(accessed August 23, 2022).

S5. P000036

Interactive Wound Dressing

DERMAGRAFT® by Advanced Tissue Sciences, Inc.

Approved September 28, 2001 with no panel meeting.

Interim analysis

[https://www.accessdata.fda.gov/cdrh\\_docs/pdf/P000036b.pdf](https://www.accessdata.fda.gov/cdrh_docs/pdf/P000036b.pdf)

(accessed August 23, 2022).

S6. P000028

Intervertebral Cervical Cage

AFFINITY™ Anterior Cervical Cage System by Medtronic Sofamor Danek approved June 13, 2002 with no panel meeting.

Credible intervals were reported in SSED.

[https://www.accessdata.fda.gov/cdrh\\_docs/pdf/P000028b.pdf](https://www.accessdata.fda.gov/cdrh_docs/pdf/P000028b.pdf)

(accessed August 23, 2022).

S7. P000058

filler, recombinant human bone morphogenetic protein, collagen scaffold with metal prosthesis, osteoinduction

InFUSE™ Bone Graft /LT CAGE™ Lumbar Tapered Fusion device approved July 02, 2002 after a January 10, 2002 panel meeting.

Bayesian predictive probabilities

[https://www.accessdata.fda.gov/cdrh\\_docs/pdf/P000058b.pdf](https://www.accessdata.fda.gov/cdrh_docs/pdf/P000058b.pdf)

(accessed August 23, 2022).

S8. P020014

Contraceptive Tubal Occlusion Device and Delivery System

Essure by Conceptus Inc.

Approved November 4, 2002 after a July 22, 2002 panel meeting.

Because of the similarity of the Phase II Study and Pivotal Study, contraceptive effectiveness results from the two studies were combined using Bayesian statistics.

[https://www.accessdata.fda.gov/cdrh\\_docs/pdf2/P020026b.pdf](https://www.accessdata.fda.gov/cdrh_docs/pdf2/P020026b.pdf)

(accessed August 23, 2022).

S9. P020026

Drug-Eluting Coronary Stent System

CYPHER™ Sirolimus-Eluting Coronary Stent by Cordis approved April 24, 2003.

Interestingly there is no report in the SSED of the Bayesian analysis but there is in the FDA presentation at the October 22, 2002 panel meeting:

<http://www.fda.gov/ohrms/dockets/ac/02/slides/3905s1.htm>

(accessed August 23, 2022).

S10. P040021

Replacement Heart Valve

SJM Biocor® Valve by St Jude Medical

Approved August 5, 2005 with no panel meeting. There is a Bayesian treatment of missing data in SSED.

[https://www.accessdata.fda.gov/cdrh\\_docs/pdf4/P040021b.pdf](https://www.accessdata.fda.gov/cdrh_docs/pdf4/P040021b.pdf)

(accessed August 23, 2022).

S11. P060018

Artificial Cervical Disc System

PRESTIGE® Cervical Disc System by Medtronic Sofamor Danek

Approved July 16, 2007 after a September 16, 2006 panel meeting.

The study was designed to use Bayesian methods with non-informative or uniform priors to analyze the primary endpoint.

Bayesian predictive probabilities

[https://www.accessdata.fda.gov/cdrh\\_docs/pdf6/P060018b.pdf](https://www.accessdata.fda.gov/cdrh_docs/pdf6/P060018b.pdf)

(accessed August 23, 2022).

S12. P040021/S004

Replacement Heart Valve

SJM Epic Valve by St Jude Medical approved November 15, 2007 with no panel meeting.

This statistical methodology provides a framework for "borrowing" historical data. Bayesian posterior means are the event rates modeled from a Bayesian hierarchical model.

[https://www.accessdata.fda.gov/cdrh\\_docs/pdf4/P040021s004b.pdf](https://www.accessdata.fda.gov/cdrh_docs/pdf4/P040021s004b.pdf)

(accessed August 23, 2022).

S13. P080007

Iliac Stent

Bard® E-LUMINEXX™ Vascular Stent by Bard®

Approved December 4, 2008 with no panel meeting.

Bayesian statistical models, using non-informative prior probabilities for the parameters of interest, were used to evaluate whether there was at least a 96% probability that the MACE rate would be less than a maximum threshold of 25% at nine months post-procedure.

[https://www.accessdata.fda.gov/cdrh\\_docs/pdf8/P080007b.pdf](https://www.accessdata.fda.gov/cdrh_docs/pdf8/P080007b.pdf)

(accessed August 23, 2022).

S14. P030031/S011

Irrigated Diagnostic Ablation Catheter

Navistar ThermoCool RF Ablation Catheter by Biosense Webster

Approved February 6, 2009 after a November 20, 2008 panel meeting.

The critical results of the Bayesian analysis are the predictive probability of success for 230 patients and the posterior probability of superiority for the THERMOCOOL group.

[https://www.accessdata.fda.gov/cdrh\\_docs/pdf3/P030031s011b.pdf](https://www.accessdata.fda.gov/cdrh_docs/pdf3/P030031s011b.pdf)

(accessed August 23, 2022).

S15. P060023

Artificial Cervical Disc

BRYAN® Cervical Disc by Medtronic Sofamor Danek

Approved May 12, 2009 after a July 17, 2007 panel meeting.

Bayesian statistical methods were planned to determine whether the investigational device is non-inferior to the control with respect to the overall success rate at 24 months. A non-inferiority margin of 10% was selected.

Non-informative priors are used for all prior distributions.

[https://www.accessdata.fda.gov/cdrh\\_docs/pdf6/P060023b.pdf](https://www.accessdata.fda.gov/cdrh_docs/pdf6/P060023b.pdf)

(accessed August 23, 2022).

S16. P080032

Bronchial Thermoplasty System

Alair Bronchial Thermoplasty System by Asthmatx

Approved April 27, 2010 after October 28, 2009 panel meeting.

Primary Effectiveness Endpoint -Integrated AQLQ Score:

For the ITT population, the difference between the groups had a Posterior Probability of Superiority of 96.0%, and for the PP population, the difference between the groups had a Posterior Probability of Superiority of 97.9%, demonstrating an improvement in the Asthma Quality of Life in the Alair group compared to Sham.

[https://www.accessdata.fda.gov/cdrh\\_docs/pdf8/P080032b.pdf](https://www.accessdata.fda.gov/cdrh_docs/pdf8/P080032b.pdf)

(accessed August 23, 2022).

S17. P100018

Intracranial Aneurysm Flow Diverter

Pipeline™ Embolization Device by ev3 Inc.

Approved April 6, 2011 after a March 18, 2011 panel meeting.

The primary safety and effectiveness endpoints were analyzed using a Bayesian statistical approach. Although prior information regarding safety and effectiveness of the Pipeline™ Embolization Device from a preceding feasibility study was used to power the study, a non-informative prior distribution was assumed.

The study was to be considered successful if, using a Bayesian analysis, the posterior probability that the effectiveness rate (pE) exceeded 50% given trial data was at least 0.975 and the posterior probability that the safety rate (pS) given trial data was less than 20% was at least 0.975.

Posterior probability, credible intervals

[https://www.accessdata.fda.gov/cdrh\\_docs/pdf10/P100018b.pdf](https://www.accessdata.fda.gov/cdrh_docs/pdf10/P100018b.pdf)

(accessed August 23, 2022).

S18. P100046

Electrosurgical device

AtriCure Synergy Ablation System by AtriCure, Inc.

Approved Dec. 15, 2011

This pivotal study was based on a Bayesian adaptive design. The performance goal

endpoints for the study were based on historical data reported in the clinical literature and the applicant's data from a previous study.  
Bayesian adaptive design with interim monitoring, posterior probabilities, credible intervals

[https://www.accessdata.fda.gov/cdrh\\_docs/pdf10/P100046b.pdf](https://www.accessdata.fda.gov/cdrh_docs/pdf10/P100046b.pdf)

(accessed August 23, 2022).

S19. P100003

Cervical artificial disc

SECURE®-C Cervical Artificial Disc by Globus Medical, Inc.

Approved Sept. 28, 2012

Bayesian predictive posterior probabilities and credible intervals were used.

[https://www.accessdata.fda.gov/cdrh\\_docs/pdf10/P100003b.pdf](https://www.accessdata.fda.gov/cdrh_docs/pdf10/P100003b.pdf)

(accessed August 23, 2022).

S20. P110008

Interlaminar Stabilization Device

coflex® Interlaminar Technology by Paradigm Spine, LLC

Approved October 17, 2012

A Bayesian statistical plan utilizing Jeffries non-informative priors and a single late-information time interim analysis was used to analyze the success of the device.

After 70% of patients were evaluable for month 24 composite clinical success, the Bayesian statistical methods were used to obtain the posterior probabilities of non-inferiority and superiority.

Bayesian credible intervals and posterior probability of non-inferiority and superiority

[https://www.accessdata.fda.gov/cdrh\\_docs/pdf11/P110008b.pdf](https://www.accessdata.fda.gov/cdrh_docs/pdf11/P110008b.pdf)

(accessed August 23, 2022).

S21. P040043/S051

Endovascular Graft

GORE® TAG® Thoracic Endoprosthesis by W.L. Gore & Associates, Inc.

Approved Sept. 10, 2013

The study used Bayesian adaptive design methodology, which allowed sample size to vary based on observed outcomes.

[https://www.accessdata.fda.gov/cdrh\\_docs/pdf4/P040043s051b.pdf](https://www.accessdata.fda.gov/cdrh_docs/pdf4/P040043s051b.pdf)

(accessed August 23, 2022).

S22, S23. P010015/S205 + P010031/S381

Family of Cardiac Resynchronization Therapy Pacemaker (CRT-P) and Cardiac Resynchronization Therapy Defibrillator (CRT-D) by Medtronic, Inc.

Panel Oct 8, 2013, Approved April 10, 2014

The prespecified statistical approach for the primary objective and stopping rules for data collection and trial completion was an adaptive Bayesian statistical design.

Posterior probabilities and 95% credible intervals were the metrics generated.

[https://www.accessdata.fda.gov/cdrh\\_docs/pdf/P010015s205b.pdf](https://www.accessdata.fda.gov/cdrh_docs/pdf/P010015s205b.pdf)

[https://www.accessdata.fda.gov/cdrh\\_docs/pdf/P010031s381b.pdf](https://www.accessdata.fda.gov/cdrh_docs/pdf/P010031s381b.pdf)  
(accessed August 23, 2022).

S24. P090029

Artificial cervical disc

PRESTIGE LP™ Cervical Disc by Medtronic Sofamor Danek

Approved July 24, 2014

A Bayesian logistic model was used to assess qualitative response outcomes, including success status, adverse event data, and additional surgical event data. A Bayesian linear model was used for assessment of surgery data. The propensity score was used as the single covariate in the Bayesian models.

[https://www.accessdata.fda.gov/cdrh\\_docs/pdf9/P090029b.pdf](https://www.accessdata.fda.gov/cdrh_docs/pdf9/P090029b.pdf)  
(accessed August 23, 2022).

S25. P140004

Prosthesis, Spinous Process Spacer/Plate

Superion® InterSpinous Spacer (ISS)

by VertiFlex®, Incorporated

Approved Feb. 20. 2015

This clinical study was designed as a Bayesian adaptive trial.

A Bayesian approach was used to test for non-inferiority. If the posterior probability of the alternative hypothesis was at least 95.8%, using non-informative uniform (Beta[1,1]) priors for each success rate then the claim of non-inferiority would be made.

[https://www.accessdata.fda.gov/cdrh\\_docs/pdf14/P140004b.pdf](https://www.accessdata.fda.gov/cdrh_docs/pdf14/P140004b.pdf)  
(accessed August 23, 2022).

S26. P130013

Left Atrial Appendage Closure System

WATCHMAN® LAA Closure Technology by Boston Scientific Corp.

Dates of Panel Recommendation: December 11, 2013 and October 8, 2014

Approval: March 13, 2015

The primary analysis was according to intent-to-treat (ITT) principles, and a Bayesian adaptive design with discounted historical priors was used for the statistical analysis.

A Bayesian approach based on a piecewise exponential model was used to evaluate the first and second primary endpoints based on time to first event. In addition, this approach included prior PROTECT AF historical data from subjects with the same CHADS2 enrollment criteria as the PREVAIL subjects with a discounting weight of 50%.

The sponsor and FDA developed a Bayesian study for PREVAIL in which a portion of the PROTECT AF data would be used as an informative prior.

This study design methodology allowed the sponsor to collect additional safety and effectiveness data on the WATCHMAN device in a least burdensome manner. In addition to new data collected in PREVAIL, continued follow-up of PROTECT AF subjects was collected to provide critical insights into long-term device safety and

effectiveness.

[https://www.accessdata.fda.gov/cdrh\\_docs/pdf13/P130013b.pdf](https://www.accessdata.fda.gov/cdrh_docs/pdf13/P130013b.pdf)  
(accessed August 23, 2022).

S27. P150010

Intra-articular Hyaluronic Acid

HYMOVIS® by Fidia Farmaceutici S.p.A.

Approved Aug. 28, 2015

A Bayesian regression analysis was undertaken in order to determine whether the effect of two injections of HYMOVIS® was non-inferior to the effect of 5 injections of HYALGAN®, with a delta of 5mm, when WOMAC A Pain scores for HYMOVIS® and HYALGAN® from baseline up to 180 days were compared under a non-inferiority test.

[https://www.accessdata.fda.gov/cdrh\\_docs/pdf15/P150010b.pdf](https://www.accessdata.fda.gov/cdrh_docs/pdf15/P150010b.pdf)  
(accessed August 23, 2022).

S28. P140005

Sodium Hyaluronate for Injection

GenVisc 850® by OrthogenRx, Inc.

Approved Sept. 2, 2015

The Bayesian longitudinal analysis included data from four randomized controlled trials, two of which included comparisons of GenVisc 850 to PBS and two of which included comparisons of Supartz/Supartz FX to PBS. The results of this Bayesian longitudinal analysis show an increasing trend in superiority of GenVisc 850 to a PBS control over time, up to 30 weeks.

[https://www.accessdata.fda.gov/cdrh\\_docs/pdf14/P140005b.pdf](https://www.accessdata.fda.gov/cdrh_docs/pdf14/P140005b.pdf)  
(accessed August 23, 2022).

S29, S30. P070015/S128 and P110019/S075

Drug eluting coronary stent system

Abbott Vascular

XIENCE family of everolimus eluting coronary stent system

Approved Sept. 23, 2015

A Bayesian hierarchical model with prior data from clinical trial databases was utilized to analyze the primary endpoint of target vessel failure (TVF) at 12 months). The TVF rate was tested against a prespecified performance goal (PG) of 14.8% (expected rate 8.6% plus a delta of 6.2%).

The primary endpoint of 1-year TVF rate was 8.04% based on the Bayesian binomial-normal hierarchical model where prior data from AV historical trials were taken into consideration.

Meta-Analysis of 4 Studies Using Bayesian Modeling To further support the clinical similarities between GenVisc 850 and Supartz/Supartz FX, a Bayesian analysis was performed.

[https://www.accessdata.fda.gov/cdrh\\_docs/pdf7/P070015s128b.pdf](https://www.accessdata.fda.gov/cdrh_docs/pdf7/P070015s128b.pdf)  
[https://www.accessdata.fda.gov/cdrh\\_docs/pdf11/P110019s075b.pdf](https://www.accessdata.fda.gov/cdrh_docs/pdf11/P110019s075b.pdf)  
(accessed August 23, 2022).



S31. P160050

Reherniation reduction device

Barricaid® Anular Closure Device (ACD)

Approved Feb. 19, 2016

The first co-primary endpoint required a subject to have no evidence of recurrent herniation at the index level at any time up to and including the 24-month follow-up. The purpose of this primary endpoint was to evaluate the Barricaid's purpose, function and principal benefit: retention of nucleus material. Barricaid was superior to Control (posterior probability >0.9999), with the Control group exhibiting a success rate that was 20.8 percentage points lower than Barricaid (Table 10-30).

The data demonstrate that, with regard to the composite co-primary endpoint, the Barricaid was better by a statistically significant superiority margin compared to Control discectomy (27.8% vs. 18.1%, posterior probability=0.9980).

[https://www.accessdata.fda.gov/cdrh\\_docs/pdf16/P160050b.pdf](https://www.accessdata.fda.gov/cdrh_docs/pdf16/P160050b.pdf)

(accessed August 23, 2022).

S32. P090029/S003

Artificial Cervical Disc

PRESTIGE LP™ Cervical Disc by Medtronic Sofamor Danek

Approved July 7, 2016

Credible intervals, predictive probabilities of non-inferiority, superiority

At FDA's request, the applicant also conducted a Bayesian hierarchical model to assess the homogeneity of the primary endpoint across sites at 24 months.

[https://www.accessdata.fda.gov/cdrh\\_docs/pdf9/P090029s003b.pdf](https://www.accessdata.fda.gov/cdrh_docs/pdf9/P090029s003b.pdf)

(accessed August 23, 2022).

S33. P970003/S207

Autonomic Nerve Stimulator for Epilepsy

VNS Therapy System by Cyberonics, Inc. (vagus nerve stimulator)

Approved June 23, 2017

Expansion of an indication for an implanted autonomic nerve simulator for epilepsy based on an OUS national registry data in a Bayesian Hierarchical Analysis

The main study was the Japanese PAS, from which there were 30 patients aged 4 – 11 years. The other studies served as prior information to be leveraged within a statistical Bayesian hierarchical model. The data were obtained from six studies/sources, which had varying sample sizes and age groups. The main study for the current indication was the Japanese PAS, from which there were 30 patients aged 4 – 11 years. The other studies served as prior information to be leveraged within a statistical Bayesian hierarchical model.

[https://www.accessdata.fda.gov/cdrh\\_docs/pdf/P970003s207b.pdf](https://www.accessdata.fda.gov/cdrh_docs/pdf/P970003s207b.pdf)

(accessed August 23, 2022).

S34. P130021/S033

Aortic valve, prosthesis, percutaneously delivered

Medtronic CoreValve™ System by Medtronic CoreValve LLC



Approved July 10, 2017

The trial employed Bayesian adaptive methods to allow for “early win” look when 1400 subjects reached 12 months of follow-up.

Credible intervals

[https://www.accessdata.fda.gov/cdrh\\_docs/pdf13/P130021S033b.pdf](https://www.accessdata.fda.gov/cdrh_docs/pdf13/P130021S033b.pdf)

(accessed August 23, 2022).

S35. P150009

Acute coronary syndrome event detector

AngelMed Guardian System by Angel Medical Systems, Inc.

Implantable Cardiac Monitor with Patient Alerting (Advisory Committees Meeting Materials; available on Web)

Approved April 9, 2018

Bayesian adaptive design was selected so that sample size could be dynamically determined during the course of the trial. Posterior probability was used to assess the level of evidence in support of a hypothesis.

To account for this uncertainty, a Bayesian adaptive design was selected so that sample size could be dynamically determined during the course of the trial. The appropriateness of the sample size was to be evaluated at different time points during the trial, with Bayesian prediction of data values for subjects who had not yet reached their 6 month follow-up visit. Posterior probabilities were used to make decisions.

[https://www.accessdata.fda.gov/cdrh\\_docs/pdf15/P150009b.pdf](https://www.accessdata.fda.gov/cdrh_docs/pdf15/P150009b.pdf)

(accessed August 23, 2022).

S36. P170013

Intracranial Neurovascular Stent

Low-Profile Visualized Intraluminal Support (LVIS) and LVIS Jr. (Intracranialneurovascular Stent) by MicroVention, Inc.

Approved May 30, 2018

Posterior probability that the primary effectiveness endpoint success rate exceeds the pre-specified PG at 12 months.

Posterior mean, posterior probability, credible intervals

[https://www.accessdata.fda.gov/cdrh\\_docs/pdf17/P170013b.pdf](https://www.accessdata.fda.gov/cdrh_docs/pdf17/P170013b.pdf)

(accessed August 23, 2022).

S37. P180007

Endobronchial valve

Spiration® Valve System by Spiration, Inc.

Approved Dec. 3, 2018

Breakthrough Device Status

Superiority of the Spiration Valve System over Control was considered established if the posterior probability for the primary effectiveness endpoint was  $> 0.982$ , a pre-specified threshold.

The pre-specified primary analysis using Bayesian multiple imputation for missing values showed that the estimated difference between the two (2) study groups. Credible intervals

[https://www.accessdata.fda.gov/cdrh\\_docs/pdf18/P180007b.pdf](https://www.accessdata.fda.gov/cdrh_docs/pdf18/P180007b.pdf)

(accessed August 23, 2022).

S38. P170030

Coronary Stent

Orsiro Sirolimus Eluting Coronary Stent System by BIOTRONIK, Inc.\_

Approved Feb 22, 2019

Non-inferiority of the Orsiro stent compared to the Xience stent in the BIOFLOW-V study was assessed using a Bayesian approach employing hierarchical models to formally incorporate data from the BIOFLOW-II and BIOFLOW-IV trials.

Bayesian posterior probability of non-inferiority; credible intervals

[https://www.accessdata.fda.gov/cdrh\\_docs/pdf17/P170030b.pdf](https://www.accessdata.fda.gov/cdrh_docs/pdf17/P170030b.pdf)

(accessed August 23, 2022).

S39. P180036

Implantable impulse generator

OPTIMIZER Smart System by Impulse Dynamics (USA), Inc

Approved Mar 21, 2019

Breakthrough Device Status

A Bayesian statistical approach was employed to leverage the data available from the FIX-HF5 trial, particularly the peak VO2 results.

For the primary effectiveness endpoint, longitudinal data from the prospective study was analyzed, borrowing of data from a previous study using a Bayesian modeling approach.

Bayesian posterior probability, credible intervals

[https://www.accessdata.fda.gov/cdrh\\_docs/pdf18/P180036b.pdf](https://www.accessdata.fda.gov/cdrh_docs/pdf18/P180036b.pdf)

(accessed August 23, 2022).

S40. P170027

SuperSaturated Oxygen Therapy

TherOx DownStream System by TherOx, Inc.

Approved April 2, 2019

The AMIHOT II trial had a Bayesian statistical design that allows for the informed borrowing of data from the previously completed AMIHOT I trial.

The Bayesian posterior probability of superiority is 95.1% for study success based on an analysis of available data; when the study results for missing data were imputed using pre-specified methods, the posterior probability of superiority is 96.9%.

The primary safety endpoint evaluated for non-inferiority using a Bayesian hierarchical model that considered 30-day MACE data from two studies.

[https://www.accessdata.fda.gov/cdrh\\_docs/pdf17/P170027b.pdf](https://www.accessdata.fda.gov/cdrh_docs/pdf17/P170027b.pdf)

(accessed August 23, 2022).

S41. P180050

Carotid sinus stimulator

BAROSTIM NEO® System by CVRx, Inc. (carotid sinus stimulator)

Approved Aug 16, 2019

Expedited Access Pathway -- Breakthrough device status

<https://www.sciencedirect.com/science/article/pii/S0002870318302217>

The BAROSTIM NEO® - Baroreflex Activation. Therapy® for Heart Failure (BeAT-HF) trial data is the basis for the PMA approval decision. A summary ...

Bayesian adaptive sample size but not mentioned in SSED.

[https://www.accessdata.fda.gov/cdrh\\_docs/pdf18/P180050b.pdf](https://www.accessdata.fda.gov/cdrh_docs/pdf18/P180050b.pdf)

(accessed August 23, 2022).

S42. P190016

Lidocaine/Epinephrine Iontophoresis and Automated Tympanostomy Tube Insertion System

Tula® System by Tusker Medical

Approved November 25, 2019

Breakthrough Device Status

The Procedural Success endpoint was analyzed in a Bayesian hierarchical framework, with prospectively-designed borrowing of data between the younger and older pivotal cohorts, with the extent of borrowing dependent upon the similarity in results.

Each age group was tested separately, however, a prospectively designed Bayesian hierarchical model was implemented which enabled data borrowing between the groups, with the extent of borrowing dependent upon the similarity/dissimilarity in results.

The procedural success rate was compared to the performance goal of 68% using a Bayesian Hierarchical model.

[https://www.accessdata.fda.gov/cdrh\\_docs/pdf19/P190016b.pdf](https://www.accessdata.fda.gov/cdrh_docs/pdf19/P190016b.pdf)

(accessed August 23, 2022).

S43. P180027

Intracranial Aneurysm Flow Diverter

Flow Re-Direction Endoluminal Device (FRED®) System by MicroVention, Inc.

Approved Dec. 16, 2019

With regard to success/failure criteria, the FRED study was designed to be successful if, using a Bayesian analysis, the two-sided 95% credible interval (CI) lower bound of the effectiveness rate exceeds the 46% PG and the two-sided 95% CI upper bound of the safety rate is below the 15% PG.

Posterior probability that the primary safety endpoint event rate is < 15%.

Bayesian analysis also allowed the computation of credible intervals for inference regarding primary endpoints.

[https://www.accessdata.fda.gov/cdrh\\_docs/pdf18/P180027b.pdf](https://www.accessdata.fda.gov/cdrh_docs/pdf18/P180027b.pdf)

(accessed August 23, 2022).

S44, S45. P170019 and P160018

FoundationOne®CDx (F1CDx) by Foundation Medicine, Inc.

Approved December 19, 2016 and November 30, 2017

P170019 granted Breakthrough Device Status

Base substitution detection is performed using a Bayesian methodology, which allows for the detection of novel somatic alterations at low mutant allele frequency (MAF) and increased sensitivity for alterations at hotspot sites through the incorporation of tissue-specific prior expectations.

The imputation model was driven by a hierarchical Bayesian logistic regression.

[https://www.accessdata.fda.gov/cdrh\\_docs/pdf16/P160018b.pdf](https://www.accessdata.fda.gov/cdrh_docs/pdf16/P160018b.pdf)

[https://www.accessdata.fda.gov/cdrh\\_docs/pdf17/P170019b.pdf](https://www.accessdata.fda.gov/cdrh_docs/pdf17/P170019b.pdf) (accessed August 23, 2022).

(accessed August 23, 2022).

S46. P190019

Drug-Eluting Peripheral Transluminal Angioplasty Catheter

Device Trade Name: Ranger™ Paclitaxel-Coated PTA Balloon Catheter by Boston Scientific Corporation

Approved Oct. 30, 2020

Bayesian predictive modeling was used to estimate the 3-year mortality rate and compared to a performance goal (PG) of 12.9%.

[https://www.accessdata.fda.gov/cdrh\\_docs/pdf19/P190019B.pdf](https://www.accessdata.fda.gov/cdrh_docs/pdf19/P190019B.pdf)

(accessed August 23, 2022).

S47. P210034

Device Generic Name: Implant, resorbable, for articular osteochondral repair

Device Trade Name: Agili-C™ by CartiHeal Ltd.

Approved March 29, 2022

Breakthrough Device Status

The primary goal of the trial was to demonstrate superiority of the Agili-C™ device relative to SSOC using Bayesian analysis. The trial would be considered a success if the posterior probability exceeds 0.98 at the final analysis.

The Bayesian analysis results were used for primary endpoint and confirmatory secondary endpoints

[https://www.accessdata.fda.gov/cdrh\\_docs/pdf21/P210034B.pdf](https://www.accessdata.fda.gov/cdrh_docs/pdf21/P210034B.pdf)

(accessed August 23, 2022).

## 2. OpenBUGS code for the Intracranial Stent Data for Table 1 Analysis

```
#Model
model {
  for( i in 1 : N ) {
    r[i] ~ dbin(p[i],n[i])      #p[i]=success proportion for stent i
    logit(p[i]) <- mu[i]      #mu[i]=logit of p[i]
```

```

    mu[i] ~ dnorm(mu0,tau) } #mu[i] is a random draw from a superpopulation
mu0 ~ dnorm(0.0,0.75)      #      with unknown mean mu0 and precision tau
tau ~ dgamma(0.11,0.09)    #mu0, tau given normal, gamma hyperpriors
s2 <- 1 / tau               #s2=variance between mu[i]'s
s <- sqrt(s2)              #s= standard deviation between mu[i]'s
}

```

#### **#Data**

```

#N= 4 = number of generations of intracranial stents
#r= counts of successful stent placements for the 4 stents
#n= sample sizes for r; NA=indicates missing data
list(r = c(6,37,42,30), n = c(8,59,56,60), N = 4)
list(r = c(6,37,42,40), n = c(8,59,56,60), N = 4)
list(r = c(6,37,42,NA), n = c(8,59,56,60), N = 4)

```

#### **#Inits**

```

list(mu=0, tau=1) #initial value of parameters (or let OPENBugs determine)

```
